# Supplementary material for: Extracellular Matrix Derived from High Metastatic Human Breast Cancer Triggers Epithelial-Mesenchymal Transition in Epithelial Breast Cancer Cells through αvβ3 Integrin
Source: PubMed Central journal article supplement (PMC7216035; doi:10.3390/ijms21082995), 2020-04-23
Supplement: ijms-21-02995-s001.pdf [file ijms-21-02995-s001.pdf]

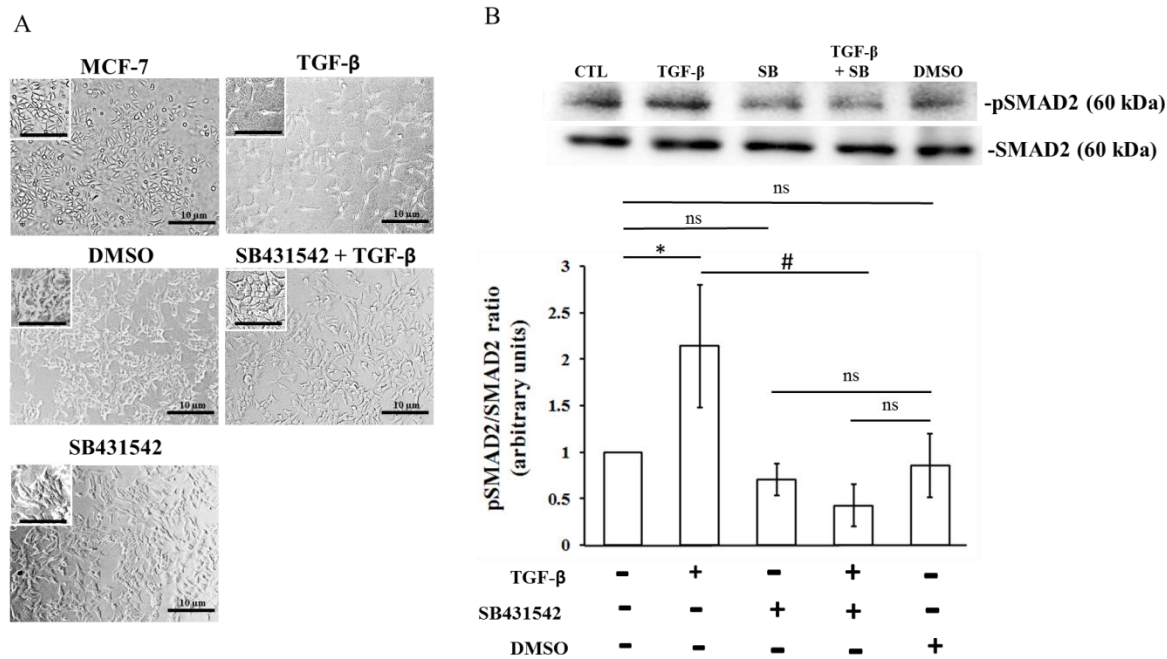

**Figure S1.** Inhibition of TGF- $\beta$  receptor decreased TGF- $\beta$  canonical signaling pathway and recovered epithelial morphology. **(A)** MCF-7 cells were cultured in standard conditions for 72 h with or without TGF- $\beta$ 1 and in the presence or absence of the TGF- $\beta$  receptor inhibitor SB431542 (15  $\mu$ g/mL). Cell morphology was analyzed and representative images were obtained at 40x magnification. Scale bar: 10  $\mu$ m. **(B)** MCF-7 cells lysates were immunoblotted with anti-p-SMAD2 and anti-SMAD2 antibodies. The results are shown as the mean fold increase relative to the control ( $*p < 0.05$ ); MCF-7 cells treated with TGF- $\beta$  ( $\#p < 0.05$ ) calculated from 3 individual experiments.

A

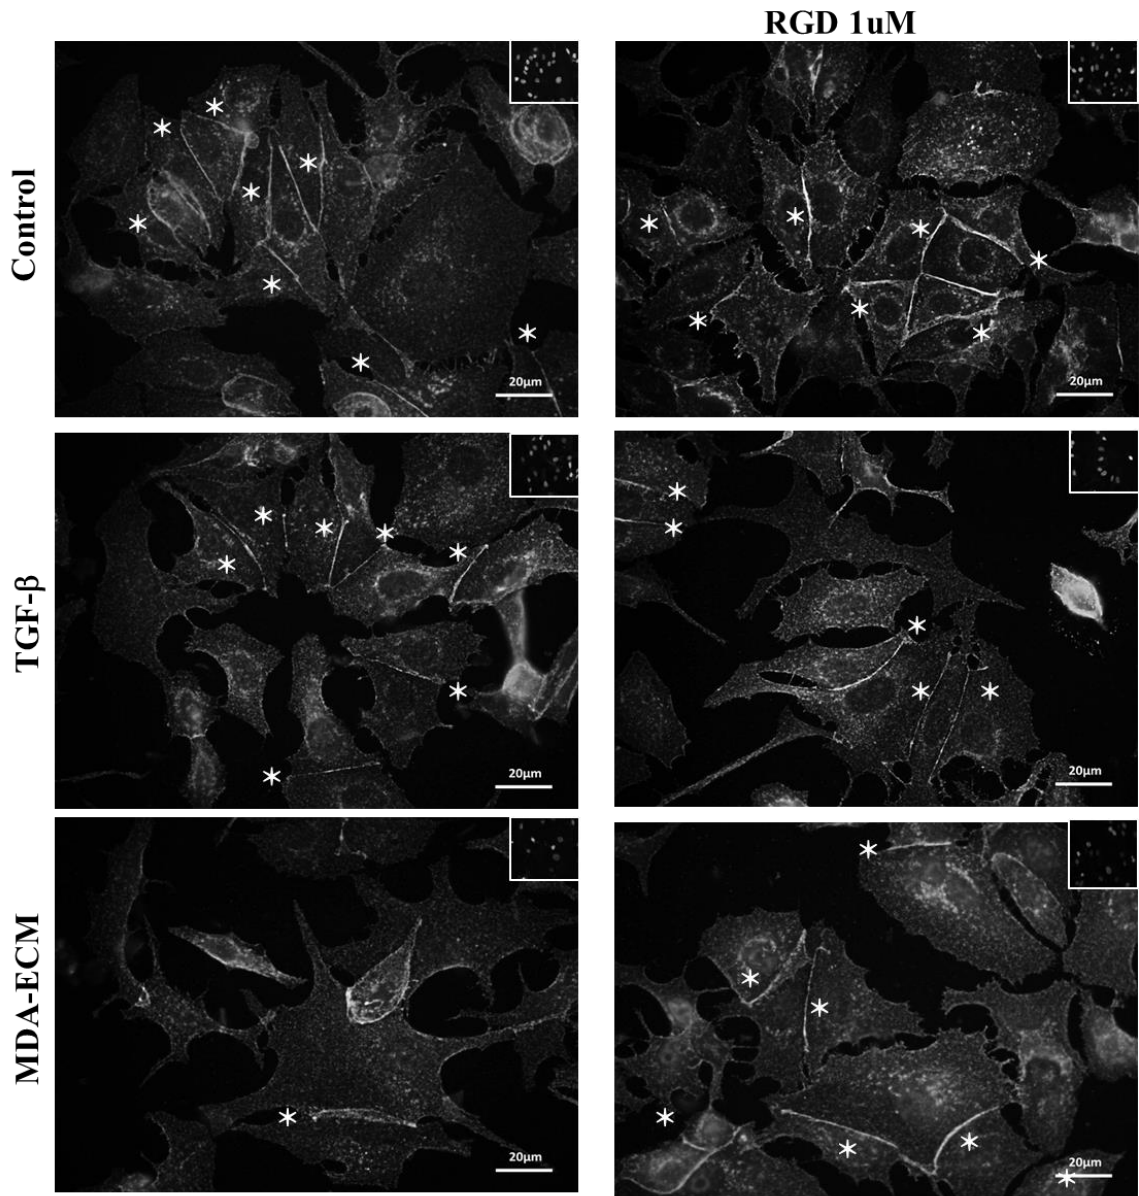

B

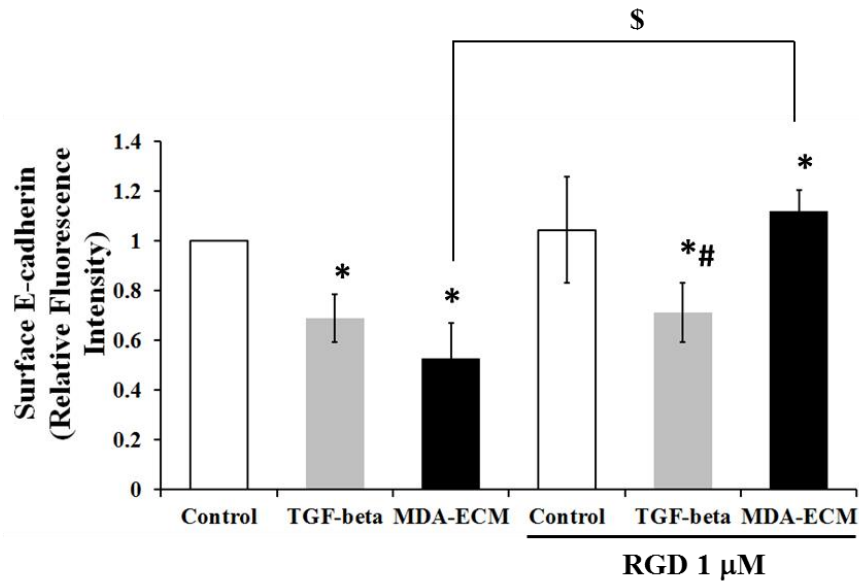

**Figure S2.** Integrin signaling modulates E-cadherin-mediated adhesion of MCF-7 cells cultured on MDA-ECM in presence of RGD peptide. MCF-ECM and MDA-ECM were obtained as described in the Methods section. MCF-7 cells were cultured on their own ECM with or without TGF- $\beta$ 1 or on MDA-ECM and treated with RGD for 72 h (1  $\mu$ M). **(A)** Effect of RGD treatment on E-cadherin expression and localization in MCF-7 cells cultured on MDA-ECM or MCF-ECM with or without TGF- $\beta$ 1. Representative images were captured on fluorescence microscopy at 60x magnification. (Asterisks: E-cadherin-mediated cell-cell contacts). Scale bar: 20  $\mu$ m. **(B)** Representative graph showing the relative fluorescence intensity of E-cadherin in intercellular junctions. The results are shown as the mean fold increase relative to controls: MCF-ECM (\* $p$  < 0.05); MCF-ECM + RGD (# $p$  < 0.05) and MDA-ECM (\$ $p$  < 0.05).
